# Supplementary figures and images for: Effectiveness of Switching Antipsychotic Medications
Source: Atypon-hosted journal article supplement (doi:10.1176/ajp.2006.163.12.2090), 2006-12-01

**Supplemental Figure A: Discontinuation Survival Curves Comparing Stayers and Switchers**

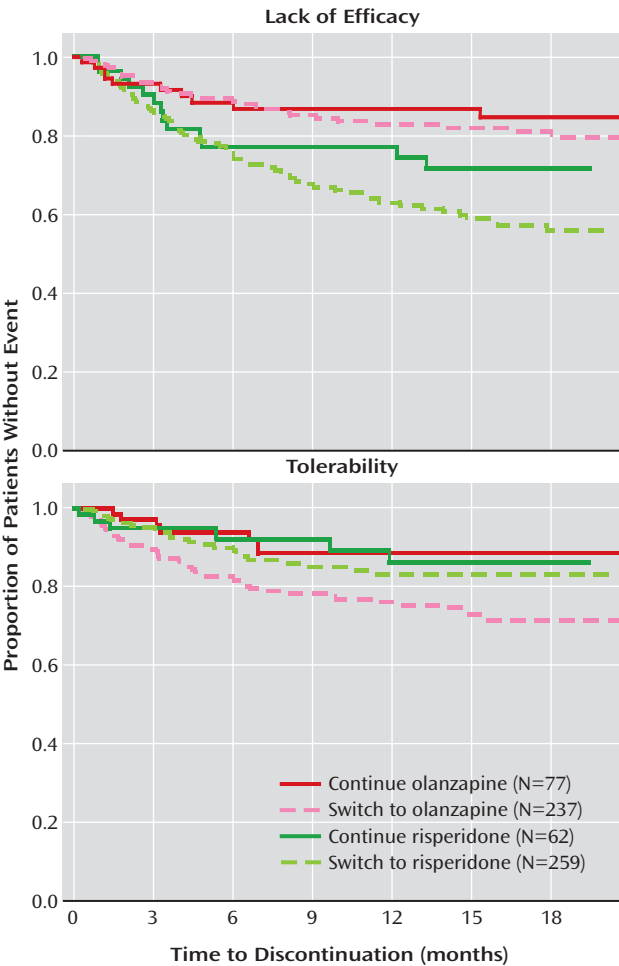

Supplement: ajp_163_12_2090_02.pdf [file ajp_163_12_2090_02.pdf]

**Supplemental Figure B: All-Cause Discontinuation Survival Curves by Baseline Medication**

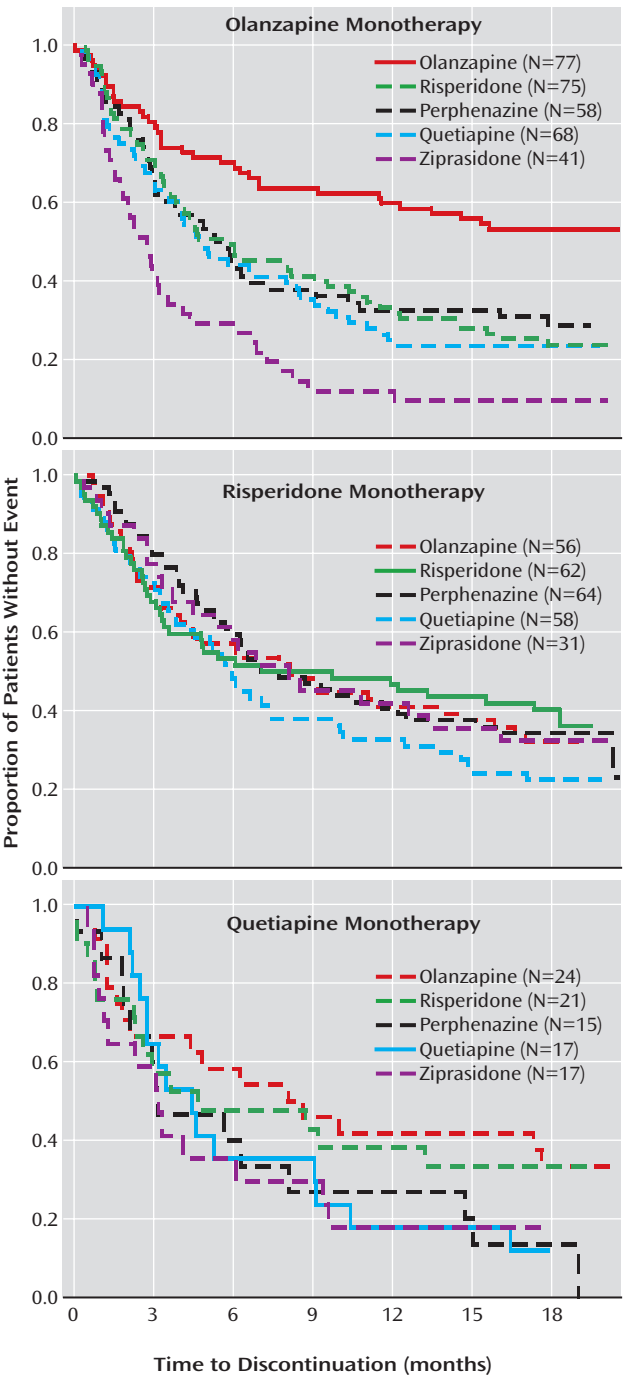

Supplement: ajp_163_12_2090_03.pdf [file ajp_163_12_2090_03.pdf]
